# Supplementary material for: Racial and Ethnic Disparities in Preoperative Surgical Wait Time and Renal Cell Carcinoma Tumor Characteristics
Source: MDPI journal article supplement (doi:10.3390/healthcare9091183), 2021-09-08
Supplement: s1 [file s1]

**Table S1.** Comparison of demographic and clinical characteristics across racial/ethnic groups.

| Variable                               | NHW        | HA         | AI/AN      | Others/Unknown | <i>p</i> |
|----------------------------------------|------------|------------|------------|----------------|----------|
| n (%)                                  | 180 (49.6) | 124 (34.2) | 30 (8.3)   | 29 (8.0)       |          |
| Age at Presentation, Median (IQR)      | 62 (53-69) | 55 (48-64) | 55 (40-61) | 59 (53-67)     | <0.001   |
| Sex, n (%)                             |            |            |            |                | 0.59     |
| Male                                   | 116 (64.4) | 71 (57.3)  | 20 (66.7)  | 18 (62.1)      |          |
| Female                                 | 64 (35.6)  | 53 (42.7)  | 10 (33.3)  | 11 (37.9)      |          |
| Surgical Wait Time (≥90 days), n (%)   |            |            |            |                | 0.14     |
| <90 days                               | 115 (63.9) | 63 (50.8)  | 16 (53.3)  | 16 (55.2)      |          |
| ≥90 days                               | 65 (36.1)  | 61 (49.2)  | 14 (46.7)  | 13 (44.8)      |          |
| Marital Status, n (%)                  |            |            |            |                | 0.001    |
| Married                                | 98 (54.4)  | 65 (52.4)  | 9 (30.0)   | 14 (48.3)      |          |
| Widowed                                | 11 (6.1)   | 10 (8.1)   | 1 (3.3)    | 2 (6.9)        |          |
| Single                                 | 41 (22.8)  | 28 (22.6)  | 19 (63.3)  | 6 (20.7)       |          |
| Divorced                               | 15 (8.3)   | 15 (12.1)  | 0 (0.0)    | 2 (6.9)        |          |
| Unknown                                | 15 (8.3)   | 6 (4.8)    | 1 (1.1)    | 5 (17.2)       |          |
| Smoking, n (%)                         |            |            |            |                | 0.01     |
| Never smoked                           | 84 (46.9)  | 81 (65.3)  | 18 (62.1)  | 20 (69.0)      |          |
| Former smoker                          | 56 (31.3)  | 31 (25.0)  | 5 (17.2)   | 4 (13.8)       |          |
| Current Smoker                         | 39 (21.8)  | 12 (9.7)   | 6 (20.7)   | 5 (17.2)       |          |
| Insurance, n (%)                       |            |            |            |                | 0.16     |
| Private                                | 46 (25.6)  | 28 (22.6)  | 3 (10.0)   | 5 (17.2)       |          |
| Public                                 | 102 (56.7) | 82 (66.1)  | 21 (70.0)  | 15 (51.7)      |          |
| No coverage                            | 8 (4.4)    | 6 (4.8)    | 1 (3.3)    | 2 (6.9)        |          |
| Unknown                                | 24 (13.3)  | 8 (6.5)    | 5 (16.7)   | 7 (24.1)       |          |
| Body Mass Index, n (%)                 |            |            |            |                | 0.06     |
| <25                                    | 34 (18.9)  | 15 (12.2)  | 3 (10.0)   | 2 (7.1)        |          |
| ≥25, <30                               | 58 (32.2)  | 29 (23.6)  | 6 (20.0)   | 12 (42.9)      |          |
| ≥30, <35                               | 47 (26.1)  | 41 (33.3)  | 7 (23.3)   | 7 (25.0)       |          |
| ≥35                                    | 41 (22.8)  | 38 (30.9)  | 14 (46.7)  | 7 (25.0)       |          |
| Hypertension, n (%)                    |            |            |            |                | 0.50     |
| No                                     | 64 (35.6)  | 45 (36.3)  | 14 (46.7)  | 6 (27.6)       |          |
| Yes                                    | 116 (64.4) | 79 (63.7)  | 16 (53.3)  | 21 (72.4)      |          |
| Diabetes, n (%)                        |            |            |            |                | 0.004    |
| No                                     | 134 (74.4) | 70 (56.5)  | 16 (53.3)  | 21 (72.4)      |          |
| Yes                                    | 46 (25.6)  | 54 (43.5)  | 14 (46.7)  | 8 (27.6)       |          |
| Family History of Kidney cancer, n (%) |            |            |            |                | 0.75     |
| No                                     | 168 (97.7) | 115 (96.6) | 25 (96.2)  | 27 (100.0)     |          |
| Yes                                    | 4 (2.3)    | 4 (3.4)    | 1 (3.8)    | 0 (0.0)        |          |
| Age at Surgery, Median (SD)            | 62 (53-69) | 56 (48-64) | 55 (40-61) | 60 (53-67)     | <0.001   |
| Histological Subtype, n (%)            |            |            |            |                | 0.001    |
| Clear cell                             | 143 (80.3) | 113 (91.1) | 27 (90.0)  | 18 (62.1)      |          |
| Papillary                              | 24 (13.5)  | 7 (5.6)    | 0 (0.0)    | 6 (3.4)        |          |
| Chromophobe                            | 7 (3.9)    | 3 (2.4)    | 1 (3.3)    | 1 (3.4)        |          |
| Mixed subtype                          | 2 (1.1)    | 1 (0.8)    | 2 (6.7)    | 2 (6.9)        |          |
| Others                                 | 2 (1.1)    | 0 (0.0)    | 0 (0.0)    | 2 (6.9)        |          |
| Grade, n (%)                           |            |            |            |                | 0.55     |
| 1 or 2                                 | 77 (44.3)  | 61 (50.8)  | 14 (46.7)  | 11 (37.9)      |          |
| 3 or 4                                 | 97 (55.7)  | 59 (49.2)  | 16 (53.3)  | 18 (62.1)      |          |

|                                                          |            |           |           |           |      |
|----------------------------------------------------------|------------|-----------|-----------|-----------|------|
| TNM Stage, n (%)                                         |            |           |           |           | 0.09 |
| I or II                                                  | 123 (68.7) | 77 (62.1) | 16 (53.3) | 14 (48.3) |      |
| III or IV                                                | 56 (31.3)  | 47 (37.9) | 14 (46.7) | 15 (51.7) |      |
| Upstaged from cT1 to pT2 or greater,<br>N1, or M1, n (%) |            |           |           |           | 0.12 |
| No                                                       | 101 (79.5) | 65 (72.2) | 16 (61.5) | 11 (61.1) |      |
| Yes                                                      | 26 (20.5)  | 25 (27.8) | 10 (38.5) | 7 (38.9)  |      |

**Table S2.** Comparison of patients who had less than 90 days and more than 90 days SWT and unadjusted logistic regression analysis results for demographic and pre-surgical clinical information.

| Variable                               | <90 days   | ≥ 90 days  | <i>p</i> | OR (95% C.I.)    | <i>p</i> |
|----------------------------------------|------------|------------|----------|------------------|----------|
| Age at Presentation, n (%)             |            |            | 0.62     |                  | 0.62     |
| <50                                    | 52 (24.8)  | 40 (26.1)  |          | Reference        |          |
| ≥50, <65                               | 86 (41.0)  | 68 (44.4)  |          | 1.03 (0.61-1.73) |          |
| ≥65                                    | 72 (34.3)  | 45 (29.4)  |          | 0.81 (0.47-1.42) |          |
| Gender, n (%)                          |            |            | 0.58     |                  | 0.54     |
| Male                                   | 133 (63.3) | 92 (60.1)  |          | Reference        |          |
| Female                                 | 77 (36.7)  | 61 (39.9)  |          | 0.87 (0.57-1.34) |          |
| Race/Ethnicity, n (%)                  |            |            | 0.14     |                  | 0.14     |
| Non-Hispanic Whites                    | 115 (54.8) | 65 (42.5)  |          | Reference        |          |
| Hispanic Americans                     | 63 (30.0)  | 61 (39.9)  |          | 1.71 (1.08-2.73) |          |
| American Indians/Alaska Natives        | 16 (7.6)   | 14 (9.2)   |          | 1.55 (0.71-3.37) |          |
| Others/Mixed/Unknown                   | 16 (7.6)   | 13 (8.5)   |          | 1.44 (0.65-3.18) |          |
| Marital Status, n (%)                  |            |            | 0.20     |                  | 0.20     |
| Married                                | 116 (55.2) | 70 (45.5)  |          | Reference        |          |
| Not married                            | 79 (37.6)  | 71 (46.4)  |          | 1.49 (0.96-2.31) |          |
| Unknown                                | 15 (7.1)   | 12 (7.8)   |          | 1.33 (0.59-3.00) |          |
| Insurance, n (%)                       |            |            | 0.009    |                  | 0.01     |
| Private                                | 58 (27.6)  | 24 (15.7)  |          | Reference        |          |
| Public                                 | 112 (53.3) | 108 (70.6) |          | 2.33 (1.35-4.02) |          |
| No insurance                           | 12 (5.7)   | 5 (3.3)    |          | 1.01 (0.32-3.17) |          |
| Unknown                                | 28 (13.3)  | 16 (10.5)  |          | 1.38 (0.64-3.00) |          |
| Smoking, n (%)                         |            |            | 0.38     |                  | 0.38     |
| Never smoked                           | 124 (59.3) | 79 (52.0)  |          | Reference        |          |
| Former smoker                          | 52 (24.9)  | 44 (28.9)  |          | 1.33 (0.81-2.17) |          |
| Current smoker                         | 33 (15.8)  | 29 (19.1)  |          | 1.38 (0.78-2.45) |          |
| Body Mass Index, n (%)                 |            |            | 0.65     |                  | 0.65     |
| <25                                    | 29 (13.9)  | 25 (16.4)  |          | Reference        |          |
| ≥25, <30                               | 66 (31.6)  | 39 (25.7)  |          | 0.69 (0.35-1.33) |          |
| ≥30, <35                               | 58 (27.8)  | 44 (28.9)  |          | 0.88 (0.45-1.71) |          |
| ≥35                                    | 56 (26.8)  | 44 (28.9)  |          | 0.91 (0.47-1.77) |          |
| Hypertension, n (%)                    |            |            | 0.83     |                  | 0.79     |
| No                                     | 77 (36.7)  | 54 (35.3)  |          | Reference        |          |
| Yes                                    | 133 (63.3) | 99 (64.7)  |          | 1.06 (0.69-1.64) |          |
| Diabetes, n (%)                        |            |            | 0.31     |                  | 0.30     |
| No                                     | 144 (68.6) | 97 (63.4)  |          | Reference        |          |
| Yes                                    | 66 (31.4)  | 56 (36.6)  |          | 1.26 (0.81-1.96) |          |
| Family History of Kidney Cancer, n (%) |            |            | 0.74     |                  | 0.63     |
| No                                     | 196 (97.0) | 139 (97.9) |          | Reference        |          |
| Yes                                    | 6 (3.0)    | 3 (2.1)    |          | 0.71 (0.17-2.87) |          |

|                                              |               |               |                  |        |
|----------------------------------------------|---------------|---------------|------------------|--------|
| Imaging Type, n (%)                          |               |               | 0.43             | 0.33   |
| CT                                           | 142 (67.6)    | 89 (58.2)     | Reference        |        |
| MRI                                          | 18 (8.6)      | 17 (11.1)     | 1.51 (0.74-3.08) |        |
| Ultrasound                                   | 30 (14.3)     | 28 (18.3)     | 1.54 (0.88-2.73) |        |
| X-ray                                        | 1 (0.5)       | 2 (1.3)       | 1.43 (0.71-2.89) |        |
| Unknown                                      | 19 (9.0)      | 17 (11.1)     |                  |        |
| Tumor Size at Imaging Assessment (cm), n (%) |               |               | <0.001           | <0.001 |
| ≤7 cm                                        | 135 (70.3)    | 126 (88.1)    | Reference        |        |
| >7 cm                                        | 57 (29.7)     | 17 (11.9)     | 0.32 (0.18-0.58) |        |
| Surgery Year                                 |               |               | 0.001            | 0.002  |
| 2010-2012                                    | 85 (40.5)     | 42 (27.5)     | Reference        |        |
| 2013-2015                                    | 51 (24.3)     | 28 (18.3)     | 1.11 (0.62-2.01) |        |
| 2016-2020                                    | 74 (35.2)     | 83 (54.2)     | 2.27 (1.40-3.69) |        |
| Nephrectomy Type, n (%)                      |               |               | 0.02             |        |
| Partial                                      | 99 (47.1)     | 95 (62.1)     |                  |        |
| Radical                                      | 89 (42.4)     | 46 (30.1)     |                  |        |
| Cytoreductive                                | 22 (10.5)     | 12 (7.8)      |                  |        |
| Surgical Approach, n (%)                     |               |               | 0.01             |        |
| Robotic                                      | 84 (40.2)     | 83 (54.2)     |                  |        |
| Laparoscopic                                 | 27 (12.9)     | 21 (13.7)     |                  |        |
| Open                                         | 98 (46.9)     | 49 (32.0)     |                  |        |
| Histologic Subtype, n (%)                    |               |               | 0.45             |        |
| Clear cell                                   | 169 (80.5)    | 133 (86.9)    |                  |        |
| Papillary                                    | 25 (11.9)     | 12 (7.8)      |                  |        |
| Chromophobe                                  | 8 (3.8)       | 4 (2.6)       |                  |        |
| Mixed/other/unspecified                      | 8 (3.8)       | 4 (2.6)       |                  |        |
| Pathology Tumor Size (cm), Median (IQR)      | 5.0 (3.5-8.1) | 4.0 (2.7-5.5) | <0.001           |        |
| Grade, n (%)                                 |               |               | 0.02             |        |
| 1 or 2                                       | 85 (41.1)     | 78 (53.4)     |                  |        |
| 3 or 4                                       | 122 (58.9)    | 68 (46.6)     |                  |        |
| TNM Stage, n (%)                             |               |               | 0.03             |        |
| I or II                                      | 123 (58.6)    | 107 (70.4)    |                  |        |
| III or IV                                    | 87 (41.4)     | 45 (29.6)     |                  |        |

**Table S3.** Factors associated with more than 90 days SWT stratified by TNM stage.

| Variable                        | Early-Stage      |          | Advanced-Stage   |          |
|---------------------------------|------------------|----------|------------------|----------|
|                                 | OR (95% C.I.)    | <i>p</i> | OR (95% C.I.)    | <i>p</i> |
| Age at Presentation             |                  | 0.49     |                  | 0.54     |
| <50                             | Reference        |          | Reference        |          |
| ≥50, <65                        | 1.43 (0.71-2.88) |          | 0.89 (0.32-2.47) |          |
| ≥65                             | 1.02 (0.47-2.21) |          | 0.74 (0.39-1.41) |          |
| Gender, n (%)                   |                  | 0.54     |                  | 0.30     |
| Male                            | Reference        |          | Reference        |          |
| Female                          | 1.20 (0.68-2.13) |          | 0.65 (0.29-1.47) |          |
| Race/Ethnicity, n (%)           |                  | 0.06     |                  | 0.34     |
| Non-Hispanic Whites             | Reference        |          | Reference        |          |
| Hispanic Americans              | 2.38 (1.25-4.53) |          | 0.76 (0.31-1.91) |          |
| American Indians/Alaska Natives | 1.01 (0.33-3.08) |          | 1.74 (0.47-6.45) |          |
| Others/Mixed/Unknown            | 0.97 (0.31-3.06) |          | 2.33 (0.63-8.66) |          |

|                  |                  |      |                   |      |
|------------------|------------------|------|-------------------|------|
| Insurance, n (%) |                  | 0.11 |                   | 0.01 |
| Private          | Reference        |      | Reference         |      |
| Public           | 2.19 (1.06-4.54) |      | 4.81 (1.44-16.08) |      |
| No insurance     | 1.27 (0.26-6.13) |      | 2.08 (0.26-16.48) |      |
| Unknown          | 3.18 (1.21-9.62) |      | 1.38 (0.27-7.12)  |      |
| Surgery Year     |                  | 0.04 |                   | 0.37 |
| 2010-2012        | Reference        |      | Reference         |      |
| 2013-2015        | 1.47 (0.64-3.39) |      | 0.71 (0.21-2.34)  |      |
| 2016-2020        | 2.47 (1.21-5.08) |      | 1.43 (0.47-4.38)  |      |

**Table S4.** Sensitivity analysis for factors associated with longer SWT.

|                                  | SWT <78 vs ≥ 78 days |          | SWT <120 vs ≥ 120 days |          |
|----------------------------------|----------------------|----------|------------------------|----------|
|                                  | OR (95% C.I.)        | <i>p</i> | OR (95% C.I.)          | <i>p</i> |
| Age at Presentation              |                      | 0.03     |                        | 0.17     |
| <50                              | Reference            |          | Reference              |          |
| ≥50, <65                         | 1.68 (0.89-3.15)     |          | 1.26 (0.68-2.33)       |          |
| ≥65                              | 0.72 (0.37-1.43)     |          | 0.69 (0.35-1.36)       |          |
| Gender, n (%)                    |                      | 0.89     |                        | 0.70     |
| Male                             | Reference            |          | Reference              |          |
| Female                           | 1.04 (0.62-1.74)     |          | 1.10 (0.67-1.83)       |          |
| Race/Ethnicity, n (%)            |                      | 0.39     |                        | 0.51     |
| Non-Hispanic Whites              | Reference            |          | Reference              |          |
| Hispanic Americans               | 1.62 (0.94-2.83)     |          | 1.20 (0.68-2.12)       |          |
| American Indians/Alaska Natives  | 1.47 (0.58-3.72)     |          | 1.25 (0.52-3.00)       |          |
| Others/Mixed/Unknown             | 1.30 (0.51-3.35)     |          | 2.05 (0.83-5.06)       |          |
| Marital Status, n (%)            |                      | 0.04     |                        |          |
| Married                          | Reference            |          |                        |          |
| Not married                      | 1.84 (1.46-5.35)     |          |                        |          |
| Unknown                          | 2.51 (0.80-7.88)     |          |                        |          |
| Insurance, n (%)                 |                      | 0.005    |                        | 0.054    |
| Private                          | Reference            |          | Reference              |          |
| Public                           | 2.80 (1.46-5.35)     |          | 2.56 (1.28-5.10)       |          |
| No insurance                     | 0.66 (0.16-2.69)     |          | 3.01 (0.83-10.92)      |          |
| Unknown                          | 1.47 (0.51-4.21)     |          | 2.46 (0.86-7.03)       |          |
| Imaging Type, n (%)              |                      | 0.03     |                        |          |
| CT                               | Reference            |          |                        |          |
| MRI                              | 1.86 (0.80-4.34)     |          |                        |          |
| Ultrasound or X-ray              | 1.79 (0.93-3.45)     |          |                        |          |
| Unknown                          | 4.22 (1.33-13.41)    |          |                        |          |
| Surgery Year                     |                      | 0.047    |                        | 0.19     |
| 2010-2012                        | Reference            |          | Reference              |          |
| 2013-2015                        | 0.79 (0.39-1.63)     |          | 1.26 (0.59-2.69)       |          |
| 2016-2020                        | 1.71 (0.91-3.22)     |          | 1.81 (0.93-3.52)       |          |
| Tumor Size at Imaging Assessment |                      | <0.001   |                        | 0.001    |
| ≤7 cm                            | Reference            |          | Reference              |          |
| >7 cm                            | 0.17 (0.09-0.33)     |          | 0.30 (0.15-0.62)       |          |
